# Supplementary material for: A Comparative Assessment of the Influences of Human Impacts on Soil Cd Concentrations Based on Stepwise Linear Regression, Classification and Regression Tree, and Random Forest Models
Source: PLoS One. 2016 Mar 10;11(3):e0151131. doi: 10.1371/journal.pone.0151131 (PMC4786095; doi:10.1371/journal.pone.0151131)
Supplement: S1 Dataset — (XLS) [file pone.0151131.s001.xls]

## Sheet: Export_Output
X	Y	Cd (mg/kg)	pH	Soil organic matter (mg/kg)	Land use type	Elevation (m)	Distance to metal smelter (m)	Distance to hardware machining (m)	Distance to building materials (m)	Distance to chemical materials (m)	Distance to others (m)	Distance to paper mills (m)	Distance to main highway (m)	Distance to town center (m)
491262	3.30769e+06	0.1888	6.79	3.04	Paddy field	77.3111	24858.7	3361.74	22616.7	14789.7	335.152	34750.7	18559.1	3330.9
493116	3.31318e+06	0.2851	7.03	2.81	Dryland	79.9639	24964.2	3520.38	23428.1	15903.7	394.97	34810.4	18685.3	4567.22
493689	3.31345e+06	0.1317	7.16	5.91	Paddy field	96.8004	26958.9	2091.09	24453.1	16355.7	425.484	36852	20659	2388.65
491490	3.31552e+06	0.3897	5.75	3.22	Paddy field	127.763	30692.6	3390.96	26905.8	18216.9	1030.7	40582.5	21974	3495.77
499923	3.32215e+06	0.2973	6.92	2.19	Forests	118.86	27912	1276.29	24063	15448.9	1172.16	37791.4	19488.6	899.556
473584	3.32399e+06	0.1286	7.35	3.52	Forests	129.602	28072.1	2062.35	24793.5	16352.1	1676.28	37968.5	20635.6	1211.63
483538	3.32535e+06	0.049	7.4	4.11	Forests	107.737	27741.1	1273.44	22860.3	13992.4	1813.76	37534	17494.2	3095.38
488562	3.33447e+06	0.1363	7.03	3.43	Paddy field	76.6261	25112.8	1325.19	21411.2	12989.5	1840.82	34986.4	17486.1	2245
494112	3.299e+06	0.027	7.31	3.33	Paddy field	97.7153	25317.5	3696.16	24424.4	17164.8	1898.39	35094.3	19088.1	5865.53
492182	3.30212e+06	0.1408	6.6	3.69	Paddy field	76.9984	23438.4	2991.59	20461.5	12460.4	2000.61	33331.3	17131.2	3775.5
475640	3.3084e+06	0.2336	7.26	2.7	Paddy field	96.2797	24859.4	4452.78	24316.2	17271.1	2517.71	34598.7	18661.7	6607.21
483022	3.31003e+06	0.2394	7.58	3.74	Paddy field	76.0089	22472.3	1762.25	19231.1	11225.7	3244.31	32352.2	15899.4	4756.61
493051	3.31136e+06	0.6273	7.48	3.48	Paddy field	81.5271	21918.1	2230.8	19177.4	11461.5	3296.1	31811.5	15638.2	5293.84
477946	3.31171e+06	0.1814	6	2.3	Paddy field	58.2788	22294.4	1103.72	18688.3	10551.9	3905.57	32153.9	15217.6	5087.51
492670	3.31486e+06	1.0511	6.52	2.5	Forests	114.894	23411	6428.44	23670.1	17195.3	4120.62	33057.2	17302.5	8305.79
459990	3.32373e+06	0.3054	6.35	2.86	Paddy field	140.861	24319	6270.07	24752.1	18257.4	4530.25	33911.6	18254.8	8662.07
486063	3.32409e+06	0.1351	7.6	3.55	Paddy field	61.5277	21105.4	90.3628	16783.7	8504.23	5961.44	30879.2	13164.4	4208.73
460976	3.32437e+06	0.4227	6.58	3.28	Dryland	59.5486	20897.3	81.0301	15918	7408.53	6821.89	30569.1	12034.5	2963.13
482951	3.32652e+06	0.1673	7.65	3.78	Dryland	87.7313	20684	97.2235	15442.2	6861.47	7305.81	30305	11474.1	2469.26
470851	3.3274e+06	0.0709	7.38	2.73	Paddy field	96.4182	18525.8	1594.49	15023	7627.55	7423.98	28345.1	12248.7	5328.13
505322	3.32884e+06	0.2701	7.19	4.95	Paddy field	97.259	18565.8	1536.05	15012.8	7582.76	7428.86	28380.4	12208.7	5251.25
471058	3.32908e+06	0.0455	7.22	4.4	Forests	62.6468	21603	866.932	14429.1	5409.91	9395.53	30798.8	8759.31	1030.01
493843	3.30076e+06	0.054	6.6	4.54	Paddy field	50.9119	20492.2	445.818	13682.1	4687.23	9584.78	29756.2	8848.94	1093.59
484882	3.30868e+06	0.1807	6.89	4.4	Paddy field	56.9221	20810.2	396.572	13821.6	4803.19	9628.79	30035.2	8680.91	1040.13
473488	3.30908e+06	0.3108	5.46	2.4	Forests	101.881	16742.7	37.4452	11781.5	4402.27	10678.7	26281.9	8920.92	4808.38
483129	3.31016e+06	0.2335	7.03	4.12	Forests	76.2347	17844.9	315.853	12037	3785.18	10702.9	27256.4	8458.43	3570.46
493467	3.31128e+06	0.2852	7.06	1.3	Orchard	56.9338	22112.7	2470.41	14074.8	5282.48	10790.7	31004.7	7368.3	2759.21
477954	3.31194e+06	0.0491	6.1	3.38	Orchard	96.65	15872	492.675	11456.8	4817.66	10985.9	25471.2	9059.56	5758.11
492293	3.31198e+06	1.2229	7.3	4.12	Forests	114.082	9855.83	6664.8	9678.75	5730.59	15444.8	19673.7	3852.98	5320.59
473600	3.3121e+06	0.2846	7.4	1.32	Paddy field	53.3352	16529.2	5310.31	7697.68	533.904	15620.5	24818.1	3179.34	3539.24
492281	3.31276e+06	1.5741	5.06	2.9	Forests	99.1714	10206.3	6137.33	8167	4045.25	15850.4	19775.6	3862.73	5255.44
493081	3.31276e+06	0.5785	7.58	3.52	Paddy field	32.4202	18122.3	6629.19	8305.57	757.447	16234.7	25974.7	2356.96	1596.38
492959	3.31339e+06	0.7624	7	3.58	Paddy field	33.3027	17377.3	6600.98	7648.62	58.1832	16513.1	25235.2	2046.91	2291.67
493059	3.31478e+06	1.9634	4.55	4.08	Paddy field	61.542	11134.6	6100.55	6253.95	1725.18	16640.6	20179	3429.56	6034.77
492816	3.31484e+06	0.9148	6.06	3.7	Paddy field	59.5211	13377.7	6364.46	5349.91	697.802	17154.2	21725.2	3332.69	6359.78
466219	3.31983e+06	0.2702	6.51	2.24	Paddy field	23.6949	17148.3	7374.06	6963.51	768.091	17364.1	24748.3	1200.98	2533.75
477046	3.32044e+06	0.1812	7.22	1.07	Vacant land	131.779	19787.2	8349.8	8379.96	2076.06	17615.9	27052.8	923.248	1143.16
483720	3.32245e+06	0.1606	5.47	2.66	Paddy field	35.8728	12180.8	7294.52	4339.74	542.529	18095.9	20400.5	3397.08	5620.49
500994	3.32269e+06	2.0211	5.54	3.18	Paddy field	56.1106	20152.6	9146.16	8103.26	2736.06	18345.5	27165.1	121.167	1940.13
473963	3.32271e+06	0.1817	6.88	2.28	Vacant land	16.4591	16377.5	8613.85	5531.84	735.13	18842.6	23542.6	3.61303	3784.51
473571	3.32382e+06	0.0926	6.57	2.88	Paddy field	32.7709	18863.3	9446.26	6803.59	2195.59	18919.3	25754.7	14.1243	2506.35
486082	3.3241e+06	0.1652	7.23	3.21	Paddy field	32.5459	17975.1	9390.57	6141.07	1291.35	19116.1	24864	55.8078	3001.71
486527	3.32544e+06	0.3536	5.89	2.61	Forests	50.635	8797.92	8972.99	4788.09	2949.1	19361.1	17411.5	615.583	3926.16
486074	3.32578e+06	0.1621	6.68	2.84	Vegetable field	58.4816	6542.37	9998.83	7183.21	5559.26	19598.6	15895	89.3354	1440.78
502025	3.32609e+06	0.1492	6.03	5.97	Vegetable field	74.1261	6482.36	10047.2	7227.94	5624.73	19628.5	15846.9	31.2091	1382.1
506509	3.32634e+06	0.0924	5.21	3.08	Paddy field	37.2184	8943.34	9352.82	4171.37	2787.12	19837.8	17257.7	260.547	4243.17
508949	3.3268e+06	0.1823	7.32	3.7	Paddy field	37.8414	9050.53	9395.67	4006.64	2700.24	19910	17288.4	291.06	4386.01
474775	3.32703e+06	0.2862	5.97	2.96	Forests	54.1749	7557.89	9817.64	5463.28	4186.78	19956.1	16310.4	46.8648	2719.04
460062	3.32773e+06	0.0213	7.4	6.2	Vegetable field	18.8349	13732.4	9600.12	2940.65	386.882	20322.1	20722.5	1122.83	3377.52
501880	3.32783e+06	0.2753	6.6	3.5	Paddy field	35.5816	9447.93	10179.9	2875.43	2833.38	20820.4	17060.9	168.464	4561.2
510085	3.32795e+06	0.1149	5.5	2.32	Paddy field	19.2661	15044.5	9635.2	3104.32	598.966	21289.3	21377.7	470.372	3105.76
493166	3.33106e+06	0.2425	6.16	3.3	Paddy field	40.7733	11606.2	10500.1	1130.52	1070	21304.3	18447.3	2084.41	2597.21
492009	3.33136e+06	0.2691	5.05	2.1	Paddy field	37.4136	8658.55	10425.2	3078.78	3785.51	21544.6	16100.6	707.423	4682.17
450483	3.33311e+06	0.088	5.96	2.92	Paddy field	86.5009	5034.4	7925.7	6664.78	5608.3	21935.7	13761.2	2021.43	1523.78
453183	3.33347e+06	0.0829	5.99	2.53	Paddy field	34.0463	15968.5	8360.07	2515.23	1544.07	22199.3	21789.3	1610.79	3358.35
456637	3.33446e+06	0.3449	5.6	2.73	Paddy field	16.7843	10804.4	11377.3	426.032	2426.81	22908.4	16900.8	456.265	2223.59
459534	3.33865e+06	0.1827	5.04	2.38	Paddy field	146.255	3691.07	6459.19	6896.9	4733.61	23204.8	12270.8	3457.84	2447.44
491989	3.30327e+06	0.4797	7.25	4.26	Paddy field	11.5785	11539.2	10316.8	737.904	2706.66	23759.8	17018.9	365.497	1499.21
507566	3.30366e+06	0.0358	5.31	2.22	Paddy field	12.4438	14944.5	6725.38	693.429	2603.67	24312.1	20878.2	1918.13	3098.27
505924	3.30452e+06	0.0267	7.23	4.09	Paddy field	30	9494.61	9564.85	2226.96	4695.38	24642.1	14697.5	139.509	3845.9
507700	3.30539e+06	0.0964	5.1	4.49	Paddy field	49.919	520.001	4276.92	9515.47	5930.84	25485.2	9417.84	6085.19	1313.14
489208	3.30563e+06	0.0194	6	2.08	Paddy field	27.7471	8798.02	8361.63	1331.47	3727.79	25623.4	13384.5	163.787	5083.93
489518	3.30608e+06	0.1253	5.89	3.54	Dryland	78.1944	373.443	5422.63	11723.8	8578.05	26239.5	8898.25	7848.17	1570.57
490987	3.30638e+06	0.4408	6	0.854	Forests	25.6787	13436.5	5122.96	1041.09	4523.5	26355.1	20068.3	128.474	3884.5
475501	3.30662e+06	0.3126	5.1	3.11	Paddy field	91.3246	5937.97	4573.6	4170.33	393.492	27045.6	9868.96	1558.02	6630.31
489210	3.30724e+06	0.6796	5.3	3.05	Forests	26.8484	11273.9	6796.68	1174.78	4899.56	27114.1	17541.2	1808.68	3551.44
500852	3.30747e+06	0.0935	7.28	2.14	Paddy field	9.61889	13866.9	3419.9	2751.14	5976.27	27194.2	19666.8	184.683	2380.52
488459	3.30818e+06	1.7163	5.89	2.74	Paddy field	34.9688	10770.4	7495.59	363.895	5290.81	27230.1	16644.7	2526.83	3709.85
499582	3.30841e+06	0.0991	4.98	2.66	Forests	37.5062	2341.56	2691.79	8876.17	5883.42	27338.2	7563.48	5262.88	1819.99
476259	3.30851e+06	0.2247	5.16	3.26	Dryland	69.9762	3291.23	1902.51	7074.8	3899.33	27573.2	7681.78	3613.67	3549.1
489655	3.30852e+06	0.0457	5.62	2.64	Paddy field	67.3372	9921.84	8695.73	31.9278	5715.78	27626.2	15111.3	3631.95	4517.16
475245	3.30864e+06	0.3818	6.42	2.02	Paddy field	8.83982	14597.2	2010.54	4309.02	7328.71	27870	19615.2	154.098	1708.76
481901	3.30914e+06	0.2138	4.56	3.24	Paddy field	46.3978	4585.64	1465.63	5761.77	3180.31	28467.3	7225.06	2301.28	4843.57
485860	3.30916e+06	0.216	6.66	3.3	Paddy field	49.7472	6168.46	3318.05	4253.99	1028.25	28552.1	8245.8	865.425	5896.82
498251	3.30922e+06	0.142	5.91	3.68	Paddy field	47.0133	6405.56	3284.49	3971.36	1023.89	28860.4	8038.58	585.141	5591.66
482132	3.30924e+06	0.335	4.73	2.98	Paddy field	30.8496	4098.05	737.87	7122.98	5108.3	28905	6156.94	3392.33	3773.54
481398	3.30926e+06	0.2227	6.68	3	Orchard	51.2024	6759.67	3541.09	3666.26	648.5	29002.1	8170.54	273.588	5347.94
482799	3.30946e+06	0.3045	6.58	2.36	Paddy field	9.38171	14511.1	417.907	5759.74	8906.92	29301.4	18721.6	154.617	1423.17
496330	3.3095e+06	0.1871	6	3.1	Paddy field	65.8482	5141.49	4913	12907.1	12911.6	29624.3	7581.5	8396.98	5916.42
495403	3.30952e+06	0.1007	5.22	2.5	Paddy field	49.1864	7225.99	3396.77	3111.5	610.064	29630.1	7765.82	276.008	4734.45
494572	3.30964e+06	0.0876	5.2	2.5	Paddy field	29.4295	5060.48	318.214	6265.53	4731.25	29805.2	5383.1	2569.05	3585.32
486425	3.30967e+06	0.184	5.77	3.4	Paddy field	57.9269	4008.07	1390.69	7615.69	6910.99	30142.5	4758.49	4371.64	3342.97
494215	3.31e+06	0.1274	5.4	3.26	Forests	132.407	8137.68	6689.92	2938.59	7077.04	30152.5	15989.5	4862.18	4806.82
477093	3.31018e+06	0.0977	4.8	1.92	Orchard	61.5204	4033.16	1650.14	7849.31	7438.33	30369.9	4565.87	4753.06	3329.84
493298	3.31027e+06	0.1505	5.52	3.74	Paddy field	81.1916	8662.55	5435.97	3584.98	8108.64	30404.7	15790.6	4536.77	5226.32
486162	3.31071e+06	0.0947	5.56	2.49	Paddy field	17.5072	5801.62	454.986	5484.42	4083.13	30434.8	4984.89	1813.96	3216.2
483352	3.31099e+06	0.1711	5.7	3.01	Paddy field	52.1304	9547.48	3882.13	4645.58	8340.02	30561.2	15734.6	4221.87	3886.61
493028	3.3111e+06	0.4202	6.5	3.3	Paddy field	41.0826	9586.6	3695.84	4873.87	8500.78	30700.3	15624.7	4160.28	3765.5
486837	3.31117e+06	0.1828	4.9	3.2	Paddy field	15.5	6142.83	487.363	5172.57	3964.51	30783.1	4675.01	1575.6	2945.06
490957	3.31127e+06	1.5084	6.51	2.8	Paddy field	8.7294	12979.6	413.709	6316.17	9766.26	30815.6	16909.7	405.637	1451.29
492977	3.31129e+06	0.5127	5.68	2.9	Paddy field	17.0646	10742.7	2000.11	5590.43	9176.2	31049.4	15697.4	2426.49	2484.21
490831	3.31131e+06	0.5691	5.06	2.59	Orchard	17.2453	7093.79	1241.12	3931.1	2196.79	31078.1	5198.29	42.9787	4092.89
493373	3.31134e+06	0.5632	5.8	1.04	Paddy field	18.2016	7190.63	1220.43	3998.64	2280.12	31256.1	4973.2	27.4687	3888.17
488447	3.31139e+06	0.1839	5.84	2.9	Paddy field	17.2973	12678.2	467.242	6635.78	10121.6	31258.9	16464.3	580.606	1852.35
492975	3.31143e+06	0.2076	6.04	3.86	Paddy field	16.9973	7187.39	1203.96	4014.06	2306.34	31266.8	4946.79	42.352	3857.13
489050	3.31148e+06	0.2667	5.6	0.744	Paddy field	17.6671	7198.48	1218.63	3999.53	2290.94	31272.1	4951.54	27.9455	3867.75
490801	3.31156e+06	1.1861	5.1	1.45	Paddy field	17.6671	7198.48	1218.63	3999.53	2290.94	31272.1	4951.54	27.9455	3867.75
492951	3.3116e+06	0.4154	5.5	2.01	Paddy field	17.6671	7198.48	1218.63	3999.53	2290.94	31272.1	4951.54	27.9455	3867.75
490775	3.3117e+06	1.6272	5.5	1.49	Paddy field	17.6671	7198.48	1218.63	3999.53	2290.94	31272.1	4951.54	27.9455	3867.75
492972	3.31171e+06	0.531	5.1	2.01	Paddy field	17.6671	7198.48	1218.63	3999.53	2290.94	31272.1	4951.54	27.9455	3867.75
492291	3.31173e+06	0.87	5.42	3.83	Paddy field	17.4281	6704.06	236.127	4624.03	3685.71	31308	4235.11	1116.19	2682.07
491054	3.31176e+06	0.9325	5.35	3.18	Paddy field	33.0197	5316.85	672.866	6550.22	6620.23	31481.3	3421.85	3565.93	2067.02
492908	3.31192e+06	0.3391	6.84	4.7	Paddy field	9.85946	12079.5	756.183	6712.15	10251.9	31607.9	15902.4	624.531	2177.57
492126	3.31198e+06	0.6176	5.74	4.84	Vegetable field	26.6499	5586.43	973.908	6461.15	6796.79	31821.8	3079.15	3530.75	1894.04
492528	3.312e+06	0.8682	6.23	3.65	Paddy field	49.2702	6626.62	3787.1	11608.9	12931.3	31847.8	5790.48	6232.95	4624.94
490957	3.31205e+06	1.1927	5.29	3.5	Forests	30	7134.34	614.613	4232.89	3952.91	32016.3	3480.06	940.543	2030.31
490609	3.31215e+06	0.3595	6.29	3.72	Orchard	87.3128	8683.86	1938.54	14463.8	15951	32030.3	8196.76	7789.47	7599.24
491954	3.31218e+06	0.3672	5	3.18	Paddy field	23.1698	5972.56	888.027	6126.53	6679.75	32178.6	2724.73	3175.76	1533.05
491012	3.31227e+06	1.8794	6.53	2.79	Paddy field	9.04594	12666.4	153.624	8345.96	11766.3	32482.4	16206.3	1093.45	3442.66
488288	3.31278e+06	0.1414	6.5	3.4	Paddy field	35.9526	6654.72	1898.5	9480.74	11230.4	32774.5	3761.34	4752.67	2534.97
492955	3.31295e+06	0.5658	6.64	4.14	Forests	138.999	10979	412.828	16742.5	18497.7	32847.4	10126.9	8810.04	8811.31
492612	3.31305e+06	0.6305	5.44	3.6	Orchard	20.2158	6770.69	716.87	5811.13	7011.45	33057.8	1843	2700.52	1304.41
492448	3.31309e+06	1.0509	7.6	5.88	Paddy field	16.1341	7196.34	1079.24	8782.43	10959.2	33460.2	2946.05	4026.13	2020.01
488559	3.31309e+06	0.1331	5.86	2.49	Paddy field	15.5	7401.29	976.625	8755.92	11067.5	33657.9	2839.82	3831.7	2094.09
493250	3.31314e+06	0.0193	5.41	2.94	Paddy field	44.7914	8287.69	1289.71	9827.29	12478.1	34201.6	3466.64	3641.19	3486.6
478769	3.31327e+06	0.1518	5.99	2.46	Paddy field	79.0232	11323.6	660.142	15052.3	17642.4	34741.6	8052.16	6322.49	6323.23
488579	3.31328e+06	0.2146	6.51	3.1	Forests	118.983	11748.4	332.876	15634.7	18213.5	34835.4	8602.46	6687.16	6595.02
493741	3.31334e+06	0.3298	4.6	1.68	Orchard	37.7437	9431.18	2382.88	11042.2	14001.7	34896.9	4240	3686.14	5002.14
493128	3.31344e+06	0.3247	5.24	1.9	Paddy field	9.11202	7156.06	2264.25	8361.1	9076.75	34929.9	11413.6	2769.38	4516.67
493379	3.31345e+06	0.2377	5.2	2.72	Orchard	27.2008	9619.84	1827.83	10406	13633.1	35335.1	3512.82	2980.9	4645.46
492888	3.31352e+06	0.1264	5.6	2	Paddy field	9.3	4593.28	2299.98	6841.68	7942.59	35356.8	10785.4	3045.58	2064.42
492079	3.31362e+06	0.3862	6.3	4.08	Paddy field	7.62944	8858.63	1564.63	3320.13	6901.35	35376.6	42.7977	732.493	2167.92
474011	3.31378e+06	0.0388	5.3	1.7	Paddy field	8.3	6802.74	1932.06	8713.03	8562.91	35392.5	10918.7	2335.85	4346.65
479391	3.31437e+06	0.1729	5.45	3.07	Forests	29.499	9752.27	1959.07	10508.6	13776.9	35434.8	3569.75	2967.76	4791.79
492591	3.3146e+06	1.0447	5.32	2	Paddy field	6.54002	6556.52	1953.28	8729	8366.26	35513.7	10764.7	2268.58	4151.07
492048	3.31468e+06	1.0202	5.24	3.43	Paddy field	12.6308	9161.51	658.466	7794.37	11347	35531	1285.1	1964.51	2715.38
492739	3.31466e+06	2.2003	5.81	1	Orchard	8.68923	5212.75	2378.83	7685.98	7752.06	35731.7	10435.9	2509.88	2924.22
492778	3.31508e+06	2.2159	4.93	1.7	Paddy field	8.17713	5375.85	2490.31	7827.42	7794.84	35740.4	10442.8	2492.86	3083.09
500992	3.31512e+06	0.1426	5.37	1.7	Forests	4.43315	5891.67	2117.26	8412.13	7797.32	35908.9	10308.6	2151.29	3689.65
472653	3.31534e+06	0.1234	6.69	6.5	Paddy field	7.11521	2848.3	2145.88	182.036	4250.97	35994.8	5870.03	2075.03	1977.83
492992	3.31536e+06	0.2856	5.56	3.48	Paddy field	9.81432	9584.32	1290.19	7295.98	11192.3	36011.4	658.02	1597.12	2905.54
492508	3.31545e+06	0.5476	5.95	4.26	Paddy field	8.41619	10314.5	1723.58	7490.67	11775.7	36715.5	433.355	845.315	3657.36
492648	3.31557e+06	0.1588	5.28	1.66	Paddy field	8.60288	2709.41	210.172	6631.54	5519.24	37716.9	8639.94	956.761	3126.56
492455	3.31559e+06	0.6966	5.33	3.38	Paddy field	7.6537	3335.93	4509.11	611.086	6149.27	37850	2983.86	568.738	3640.6
476438	3.31561e+06	0.0156	5.02	2.12	Paddy field	8.95958	2020.78	993.212	5935.83	5406.2	37975.3	8627.34	601.708	3362.91
492170	3.31561e+06	0.6361	5.22	2.07	Dryland	8.25333	3975.23	1634.83	8496.85	5573.32	38026.8	8145.35	299.316	4370.69
491453	3.31571e+06	0.5381	6.64	3.93	Paddy field	6.14482	4435.86	3907.63	434.474	6668.83	38065.4	2465.62	375.068	3358.82
491520	3.31594e+06	0.7276	6.33	2.2	Paddy field	7.84225	1161.46	3718.19	3436.12	6560.32	38212.9	9559.63	282.198	4603.73
477115	3.3162e+06	0.0193	6.36	2	Paddy field	6.71269	917.017	3155.43	3975.28	6160.13	38240.8	9436.5	434.114	4305.75
465221	3.31647e+06	0.2105	6.62	1.67	Paddy field	7.38655	1128.78	3566.58	3625.46	6382.56	38298.2	9643.57	252.493	4574.84
470968	3.31662e+06	0.1784	5.87	1.66	Paddy field	8.61377	3561.93	1088.5	7444.62	4857.62	38456	7695.26	317.919	4234.44
478352	3.31711e+06	0.0271	6.06	1.24	Paddy field	6.74099	3543.35	899.667	6808.79	4649.95	38566.6	7672.12	282.095	4089.91
504559	3.31725e+06	0.2176	5.53	3.04	Paddy field	25.5126	13343.4	4825.32	11546.2	13349.6	38953.6	3687.67	570.796	1418.62
465063	3.31727e+06	0.0611	6.6	2.18	Paddy field	5.98208	1994.74	2405.34	4791.49	4793.33	39154.6	8078.59	372.166	4728.22
467369	3.31729e+06	0.2475	5.71	3.773	Paddy field	8.66937	230.478	3446.06	1608.62	8158.32	39449.7	5618.58	112.945	2691.47
504757	3.31736e+06	0.2176	4.71	2.8107	Vegetable field	9.23044	297.004	3486.75	1796.24	8277.72	39493.1	5836.97	302.873	2582.93
506012	3.3176e+06	0.0653	5.48	2.14	Paddy field	7.28242	1622.1	2504.79	4217.29	4703.43	39596.5	7962.61	624.334	5011.54
504420	3.31774e+06	0.0901	5.04	2.5757	Paddy field	9.64287	296.857	3613.77	1990.26	8445.02	39614.4	5964.87	387.969	2430.86
470859	3.31792e+06	0.1021	7.7	4.2181	Paddy field	9.52805	166.2	4172.4	2216.43	8846.68	40176.5	5496.43	205.682	2021
504185	3.31797e+06	0.0855	5.1	1.98	Paddy field	8.72466	5681.19	2119.11	1848.54	9162.79	40380.1	386.599	1748.43	1721.69
501293	3.3186e+06	0.058	6.24	2.82	Paddy field	7.05278	4222.78	3459.05	2660.85	8792.81	40431.6	474.723	415.907	997.049
468300	3.31866e+06	0.2732	7.34	3.95	Forests	10.5376	449.981	4442.67	2413.46	8965.42	40442.2	5371.07	427.03	1841.07
475056	3.31917e+06	0.18	7.76	3.6124	Paddy field	9.00489	361.308	4463.46	2565.02	8669.65	40470.5	5666.06	173.771	1674.05
466864	3.31928e+06	0.3018	8.31	3.01	Paddy field	8.08072	158.474	4543.32	2972.14	7987.46	40499.9	6359.97	165.033	1502.27
489299	3.31931e+06	0.4557	5.41	3.57	Paddy field	42.7238	15368.8	6765.21	13589.6	13546.8	40527.8	5628.61	1079.24	1010.45
465533	3.31953e+06	0.3872	6.96	1.9385	Paddy field	12.9775	513.372	3360.27	2976.31	5255.18	40531.5	8297.2	315.302	3333.8
470940	3.31967e+06	0.2949	7.47	4.8824	Paddy field	9.68169	523.756	4548.07	2553.47	8845.34	40552.1	5466.07	386.853	1694.88
500704	3.31978e+06	0.0536	4.71	0.5674	Forests	50.5972	601.638	4625.9	2553.24	9002.25	40621.2	5290.74	573.042	1737.85
474783	3.32021e+06	0.1521	5.73	2.42	Paddy field	8.41176	7291.93	552.882	2317.31	8740.95	40712.5	1680.44	2284.37	3083.84
473043	3.32058e+06	0.1694	5.97	2.43	Vegetable field	8.06706	8078.32	531.248	2804.43	8433.74	40781.6	2078	2561.16	3876.72
478359	3.32069e+06	0.1483	5.9	4.04	Paddy field	74.1188	16222.8	6467.86	15289.9	14845.9	40792.7	7334.25	2425.5	2717.31
491954	3.32095e+06	0.2735	7.75	4.8835	Paddy field	11.7683	312.905	3298.58	2703.45	5151.54	40804.6	8145.45	80.2325	3214.51
466330	3.32133e+06	0.3641	7.27	4.4727	Paddy field	15.7814	176.368	3586.45	2670.55	5421.67	40809.9	8383.39	214.833	2934.56
500347	3.32157e+06	0.313	7.73	5.0085	Paddy field	12.4742	251.528	3362.54	2618.21	5197.86	40879.1	8169.09	53.4671	3110.45
492533	3.32197e+06	0.2416	7.7	4.4945	Paddy field	9.9344	202.788	2971.69	2641.55	4825.06	40913.8	7833.19	156.478	3475.57
459974	3.322e+06	0.3032	6.31	2.3005	Paddy field	10.1162	104.933	4951	3005.63	8573.65	40958	5670.4	375.64	1244.88
499074	3.32207e+06	0.2468	7.92	3.3764	Paddy field	9.32883	226.823	4966.92	3122.22	8323.82	40967.3	5922.48	149.788	1117.82
501833	3.32213e+06	0.1764	7.46	4.1537	Paddy field	8.75508	132.981	2843.67	2560.44	4685.5	41013.5	7687.36	293.46	3553.66
495022	3.32217e+06	0.2053	7.99	2.7714	Paddy field	9.1948	459.166	5035.81	3294.62	8054.03	41017.3	6190.11	72.2806	996.682
502856	3.32238e+06	0.1983	4.68	1.3101	Vacant land	62.184	384.291	5026.78	2934.89	8899.34	41025.1	5334.12	712.707	1414.7
469266	3.32253e+06	0.3386	7.35	2.6242	Paddy field	9.35708	220.278	5239	2957.44	6970.3	41038.5	7292.1	173.921	1360.93
470588	3.32265e+06	0.1246	6.88	3.9	Paddy field	15.6067	1324.85	332.133	5243.87	2127.97	41086.3	5239.28	1839.37	4647.33
483157	3.32273e+06	0.1722	7.92	3.6754	Paddy field	9.96242	161.649	5099.7	3218.68	8356.27	41102.6	5875.56	256.02	1019.56
501322	3.32278e+06	0.2021	7.4	4.5476	Paddy field	14.0522	115.306	3124.47	2416.97	4925.85	41116.6	7871.94	247.581	3230.53
474910	3.32287e+06	0.083	7.8	3.6698	Paddy field	9.90906	355.778	5126.37	3321.17	8160.45	41118.6	6072	83.7546	927.349
502357	3.32316e+06	0.1577	5.06	2.4126	Paddy field	18.172	270.035	2623.06	2448.43	4444.73	41173.9	7438.06	521.798	3706.89
481223	3.32318e+06	0.0997	6.2	3.2795	Dryland	27.6599	300.552	2637.44	2317.04	4426.88	41300.3	7389.39	619.375	3650.48
482888	3.32327e+06	0.1585	7.57	4.1042	Paddy field	13.5386	146.084	5340.98	3416.28	8381.07	41345.9	5839.2	421.888	851.202
503482	3.32357e+06	0.2155	8.08	4.3925	Paddy field	11.7487	305.957	5073.49	2548.47	6739.23	41436.4	7485.43	180.345	1252.77
495773	3.32361e+06	0.2375	6.9	3.6295	Paddy field	13.2936	432.235	4945.43	2319.75	6577.06	41624.4	7643.06	314.948	1307.86
506482	3.32389e+06	0.0355	6.29	3.439	Paddy field	14.3773	436.511	4577.81	2097.56	6210.76	41644.6	8009.81	306.264	1661.43
460724	3.32406e+06	0.4324	5.22	3.6007	Paddy field	19.0342	401.97	3914.47	1849.94	5557.04	41660.4	8290.99	376.086	2314.84
486082	3.3241e+06	0.1253	7.38	4.8646	Vacant land	82.1914	297.885	2949.55	1859.61	4613.39	41693.5	7440.78	819.263	3274.05
486082	3.3241e+06	0.1714	6.24	2.6621	Paddy field	15.1001	599.33	4869.49	2232.87	6606.44	41782.4	7616.78	150.837	1219.87
486082	3.3241e+06	0.1196	5.31	1.87	Paddy field	18.281	864.798	5210.88	2619.91	7142.75	41792.5	7085.54	140.126	688.987
486082	3.32411e+06	0.1489	4.91	3.34	Vegetable field	17.8299	1976.31	403.614	4021.76	1688.02	41820.2	4969.35	2166.78	5584.73
496036	3.32438e+06	0.2892	6.75	3.3885	Dryland	36.1771	201.935	3850.18	1591.18	5431.44	41909.3	8107.28	486.72	2376.17
473371	3.32458e+06	0.1261	8.08	4.4891	Paddy field	19.751	915.34	5067.76	2482.83	7042.71	41916.3	7184.93	202.395	739.496
509752	3.32477e+06	0.0487	6.43	1.5677	Paddy field	21.723	1087.66	5061.21	2507.59	7138.77	42042.5	7093.24	373.897	616.025
470527	3.3251e+06	0.0584	5.73	3.2046	Vacant land	33.5384	49.9037	3951.52	1468.96	5493.86	42052.3	8122.25	323.83	2291.89
474396	3.32528e+06	0.208	5.23	3.5827	Dryland	19.3561	957.694	4643.52	2040.54	6616.3	42134.1	7615.1	191.838	1137.18
487280	3.32551e+06	0.3631	5.53	3.3646	Forests	40.3176	1079.92	4816.18	2250.88	6891.27	42158.6	7344.85	352.899	861.195
508554	3.32564e+06	0.0188	5.73	2.7981	Forests	114.571	294.233	3754.93	1302.65	5254.87	42182.9	7870.27	431.911	2518.03
463392	3.32573e+06	0.041	7.36	3.6758	Paddy field	18.0743	205.515	3960.91	1327.51	5583.41	42244.7	8165.51	91.3372	2174.45
502748	3.32594e+06	0.1148	5.68	2.8751	Paddy field	37.3552	1224.48	5012.83	2514.9	7239.19	42255.1	7012.34	625.341	544.552
476887	3.32609e+06	0.1218	7.63	4.06	Paddy field	18.8164	661.929	241.954	5107.55	1011.47	42263.4	4035.38	3039.82	4313.68
502777	3.32616e+06	0.2103	4.75	2.2741	Forests	51.1361	1217.63	4741.8	2203.52	6901.56	42294.1	7346.95	486.432	867.456
508872	3.32634e+06	0.1705	5.11	3.5255	Paddy field	17.5902	1059.56	4431.24	1841.85	6489.18	42332.9	7754.78	317.239	1270.75
478361	3.32644e+06	0.0987	4.56	2.3385	Forests	129.164	1327.86	4950.11	2538.43	7354.92	42528.4	6943.28	935.101	624.899
490966	3.32647e+06	0.3058	5.1	2.4553	Paddy field	16.5573	593.237	3711.65	1064.93	5638.79	42612.1	8142.67	66.623	2133.82
485256	3.32651e+06	0.2605	4.73	1.7739	Vacant land	95.1308	1453.42	4828.71	2433.32	7270.76	42628.5	7045.08	978.985	750.115
464340	3.32674e+06	0.0121	6.06	3.7125	Paddy field	16.4192	720.726	3494.04	846.297	5469.98	42775.8	7947.2	108.046	2327.31
505043	3.32689e+06	0.163	6.26	3.066	Dryland	18.3339	690.972	3404.39	757.236	5360.13	42815.3	7834.39	67.1029	2440.11
474727	3.32698e+06	0.1289	5.59	1.6358	Vacant land	19.2269	614.239	3242.72	601	5215.42	42924.4	7672.15	13.7112	2603.65
507377	3.32693e+06	0.2612	5.26	4.7608	Paddy field	18.4218	565.471	3122.17	495.405	5092.5	42997.2	7538.41	60.2901	2738.51
504927	3.32701e+06	0.2247	6.1	2.7537	Paddy field	17.2169	656.503	3146.89	501.78	5186.29	43024.6	7620.31	33.054	2660.63
484466	3.32707e+06	0.1291	5.41	3.1365	Paddy field	15.827	598.868	2928.32	336.957	4941.61	43142.9	7359.01	80.3086	2923.75
460318	3.32721e+06	0.0678	6.4	2.9	Paddy field	17.7718	367.87	1436.24	5702.61	1041.41	43241.3	2926.75	4002.98	3811.55
500444	3.3273e+06	0.2686	6.67	0.6	Paddy field	22.5604	827.125	1848.96	6241.11	1581.29	43291.7	2854.07	4041.79	3323.25
505593	3.3273e+06	0.1354	5.44	3.6465	Dryland	26.6955	961.453	2990.66	399.805	5316.13	43311	7671.51	326.57	2661.79
504079	3.32744e+06	0.3194	5.36	2.702	Forests	40.2548	1046.31	2907.5	373.138	5318.53	43419	7645.48	397.265	2714.76
502573	3.32762e+06	0.1765	7.3	4.32	Paddy field	25.9822	2226	1257.61	3344.6	1101.31	43608.4	3789.76	3576.49	5243.9
509083	3.32763e+06	0.1649	7.36	4.02	Paddy field	27.0911	1226.98	2090.38	112.369	4376.95	43809.2	6626.41	311.909	3725.08
509504	3.32793e+06	0.1541	7.74	4.2	Paddy field	26.6208	1563.82	1161.49	4562.28	382.702	44184.6	2530.62	4686.8	4767.13
488931	3.32812e+06	0.1734	6.5	5.12	Paddy field	8.59674	8690.21	1044.59	5696.84	5917.21	44301.1	496.117	1569.76	3823.33
488035	3.32814e+06	0.054	5.71	2.77	Paddy field	7.92096	13200.5	283.595	8114.95	5009.25	44413.7	1601.66	3700.15	2476.75
511840	3.32822e+06	0.1381	5.55	3.14	Paddy field	7.93053	13101.3	283.185	8068.01	4878.73	44493.9	1624.12	3585.08	2459.6
487350	3.32827e+06	0.1713	6.06	3.88	Paddy field	28.649	901.462	1456.51	437.282	4767.47	44732.6	6631.11	38.917	4086.64
487717	3.32836e+06	0.0715	7.3	3.7	Paddy field	7.75868	9472.29	908.437	6516.02	5113.8	45097	400.472	1686.34	4643.92
483186	3.32854e+06	0.1373	6.42	4	Paddy field	6.67765	10125.7	376.417	6684.38	4542.19	45124.3	722.776	2371.28	5055.36
504801	3.3287e+06	0.1859	6.02	2.88	Paddy field	36.6842	684.378	1073.75	716.702	4806.61	45224.1	6422.53	23.3108	4515.16
486078	3.32873e+06	0.057	6.86	4.76	Paddy field	8.03075	9591.74	1277.54	7048.13	5056.53	45661.5	345.812	986.621	4216.61
481354	3.32883e+06	0.2795	6.03	2.99	Paddy field	6.84814	14480.7	391.542	9579.81	4057.45	45812.4	3127.85	2480.85	969.625
486426	3.32924e+06	0.0058	5.25	3.1	Paddy field	44.0279	1143.63	1235.79	155.626	5422.53	45992.5	6675.46	18.6581	4911.96
462351	3.32944e+06	0.0314	6.16	4.1	Paddy field	6.46225	10667.3	155.631	7519.56	3918.27	46000.2	679.337	1601.85	4198.87
505052	3.32949e+06	0.3154	5.87	2.18	Orchard	6.32041	13424.7	1748.24	9008.3	2917.54	46282.2	1801.91	1679.07	1906.29
462392	3.3295e+06	0.0416	5.68	3.1	Paddy field	6.49996	10998.4	184.192	7841.44	3587.14	46297.2	405.115	1469.99	4004.55
453176	3.32952e+06	0.0867	4.7	2.7	Paddy field	8.8657	9160.84	2969.5	7982.85	6032.72	46513.3	428.623	808.956	3609.46
505242	3.3296e+06	0.2236	5.32	2.44	Paddy field	6.39064	14838.2	361.854	10098.2	3426.46	46530.8	3422.51	1764.62	334.81
505944	3.3299e+06	0.2236	5.13	3.8	Paddy field	55.174	1971.1	1131.29	315.748	6223.1	46793.7	7157.76	2.00353	4130.99
458675	3.33069e+06	0.3259	6.94	3.22	Paddy field	28.2729	4072	2111.77	7125.09	1454.94	46941.1	342.78	6899.3	3458.22
492433	3.33088e+06	0.3014	7.1	2.5	Paddy field	6.85891	11179	907.502	8409.59	3540.64	46950	544.692	648.581	3197.4
458564	3.33145e+06	0.1098	6.05	2.84	Orchard	6.26838	14057.2	1739.24	9743.8	2289.55	47005	2042.27	989.643	1653.7
455912	3.33147e+06	0.2894	5.18	1.56	Orchard	6.26327	13900.7	1945.16	9651.21	2202.5	47021.9	1820.07	939.658	1876.56
489995	3.33197e+06	0.0922	6.85	3.1	Paddy field	7.10462	12096.2	1289.78	8865.54	2497.1	47214.3	81.6992	1138	3628.81
490198	3.332e+06	0.1637	4.69	4.08	Paddy field	11.1876	8558.96	4532.85	9049.07	7309.68	47289.9	246.598	2487.27	3903.27
453158	3.33205e+06	0.2203	5.91	4.49	Forests	107.752	2563.87	498.412	969.056	6753.73	47416.1	7454.17	248.584	3512.75
459211	3.33217e+06	0.289	5.41	4.08	Paddy field	14.721	9079.16	4130.45	9060.2	6700.5	47442.4	366.329	2126.61	3361.26
457700	3.33235e+06	0.3214	4.4	3.34	Dryland	90.7609	5121.21	3271.57	8140.52	2619.03	47825.1	1506.54	7894.81	3805.51
489360	3.33249e+06	0.1206	5.69	3.6	Paddy field	9.54667	12216.7	1744.32	9399.56	2657.58	47880.2	688.514	217.953	2703.99
490855	3.33326e+06	0.1911	5.78	3.7	Paddy field	6.18013	15873.7	1408.39	11404.2	2233.8	48044.8	3218.71	507.892	1282.39
492137	3.33409e+06	0.3287	5.45	3.3	Paddy field	8.494	13285.1	2487.15	9997.14	1350.76	48221.6	232.866	147.933	3570.4
491617	3.33458e+06	0.0358	5.2	2.86	Vegetable field	31.9561	7889.13	6593.04	7526.66	9996.91	48391.2	3180.04	1975.5	2396.59
454567	3.33482e+06	0.0666	5.14	2.5	Paddy field	6.2124	17224.6	669.467	12572.6	2852.29	48562.6	4565.52	966.517	2143.89
495680	3.33478e+06	0.196	5.64	2.92	Paddy field	77.3275	3806.43	179.414	2251.04	7894.2	48583.5	8243.94	196.865	2451.86
486350	3.33487e+06	0.3152	5.69	3.4	Paddy field	7.31989	17934.8	235.756	13160.6	3378.16	48703.5	5399.17	1405.82	2772.99
497254	3.33647e+06	0.2657	5.65	2.8	Paddy field	7.6554	18149.3	246.366	13379.5	3376.76	48878.6	5550.05	1363.32	2990.13
457027	3.3375e+06	0.305	5.75	3.1	Orchard	5.78781	16296.8	1243.36	12052.8	1429.22	48955.5	2983.91	378.336	2225.72
488710	3.33751e+06	0.0698	5.35	2.7	Orchard	6.33119	17717.7	261.811	13104.3	2682.84	49057.7	4840.22	734.675	2678.83
457682	3.33796e+06	0.1673	4.81	2.9	Paddy field	6.26978	16322.2	1337.56	12125.1	1274.86	49091	2916.72	546.339	2378.58
497447	3.33818e+06	0.5111	5.65	2.8	Forests	8.32179	18872.4	181.79	14136.9	3388.76	49541	6042.04	1217.74	3732.76
491389	3.33917e+06	0.0485	4.49	1.9	Paddy field	6.58729	17007.5	968.036	12775.2	1264.43	49561.2	3533.07	603.639	2789.89
458959	3.33957e+06	0.1251	5.6	3.38	Forests	61.7657	6940.95	2238.66	8936.03	4512.17	49967	3393.09	8794.32	3037.03
489290	3.34e+06	0.142	5.51	3.17	Paddy field	100.84	5030.63	886.574	3723.77	8839.25	50142	8817.47	343.945	1060.87
473047	3.31061e+06	0.2486	5.96	3.53	Paddy field	38.1174	11556.3	5641.93	11785.9	6530.96	50383.1	2763.3	4076.34	2130.11
491470	3.31134e+06	1.3576	5.99	1.84	Paddy field	9.99895	17263.8	2251.22	13388.9	95.7763	50632.9	3399.78	1932.97	3945
490850	3.31202e+06	1.6582	4.81	4.47	Forests	86.0659	11719.1	5961.02	11788.9	6753	50678	3055.22	4400.86	2358.11
492350	3.31329e+06	1.4748	5.96	3.79	Paddy field	20.5003	16545.3	3539.04	13087.9	307.31	50882.4	2713.19	2812.62	4101.15
492345	3.31531e+06	0.4504	5.97	3.86	Paddy field	53.6324	11733.1	6455.21	11547.8	7251.16	50969.6	3570.5	4367.7	2864.56
459809	3.32897e+06	0.3631	5.45	3.82	Forests	70.6271	16128	4492.27	13007.8	1172.68	51094.9	2667.13	2851.67	4095.59
482634	3.33141e+06	1.9505	5.97	3.86	Forests	53.7145	11951	6470.28	11768.9	7145.96	51121.4	3540.34	4523.2	2652.34
496977	3.30936e+06	0.1203	5.4	2.18	Dryland	68.2889	8679.07	548.855	10628.5	6203.18	51262.9	5069.55	10426.8	1265.43
466586	3.31684e+06	0.3241	6.5	2.09	Forests	9.79098	18314.9	2042.97	14377.7	210.143	51382.1	4452	2052.76	4053.35
500955	3.31809e+06	0.0838	5.84	2.82	Paddy field	136.949	6252.84	2466.4	5237.9	9690.3	51714.3	9502.95	770.385	968.69
494578	3.32063e+06	0.0769	5.03	3.58	Dryland	99.2112	13228.9	7067.52	12881.5	7066.81	52234.8	4012.37	5215.26	1553.92
500174	3.32302e+06	0.2135	4.63	4.5	Forests	40.1601	18749.7	3359.88	15257.8	1343.54	52771.8	4921.67	3762.6	2342.47
483158	3.32311e+06	0.1497	5.77	3.3	Paddy field	7.10714	19623.4	2390.58	15870.3	1033.54	52952.9	5720.78	2950.56	2881.72
485850	3.32401e+06	0.1467	5.23	2.5	Paddy field	8.17562	20142	1787.95	16208.4	325.419	52953.6	6251.65	2443.28	3546.18
486082	3.3241e+06	0.1536	5.82	4	Paddy field	8.65739	19341.6	2782.38	15696	1387.11	52956.9	5456.4	3294.33	2556.84
506471	3.32488e+06	0.0709	5.36	2.3	Paddy field	9.96764	20656.1	1933.48	16696.2	226.514	53326.1	6767.71	2632.59	3679.99
485747	3.3259e+06	0.2427	5.78	2.3	Paddy field	10	21168	2446.1	17257.8	724.361	53899.6	7267.7	3153.64	3571.86
465152	3.32724e+06	0.056	5.37	3.52	Paddy field	27.0919	19459.3	4572.22	16335.5	2824.36	54116.7	5939.06	5093.24	872.017
500395	3.32748e+06	0.2404	5.39	4	Paddy field	9.46716	22844.2	4057.62	19022.7	2496.19	55599	8942.63	4757.59	4034.73
492032	3.33398e+06	0.225	5.86	3.28	Paddy field	143.429	11758.1	8328.18	11081.9	14348.6	57582.7	13821	5378.1	724.601
456912	3.33598e+06	0.4354	4.75	2.82	Paddy field	93.8275	13298.6	9530.59	12381.1	16139.8	58692	14517.6	4351.64	2690.84
491350	3.33859e+06	0.0431	5.74	2.96	Paddy field	135.42	13576.8	10178.1	12935.2	16021.3	59433.9	15438.7	6085.25	2439.2
